# Supplementary material
Source: MDPI journal article supplement (https://www.mdpi.com/2073-445X/11/3/369)
Supplement: s1 [file s1]

**Table S1.** *Ephedro nebrodensis*-*Pinetum halepensis*.

|                                                                       |        |        |        |        |        |        |        |                 |        |        |        |        |        |        |        |
|-----------------------------------------------------------------------|--------|--------|--------|--------|--------|--------|--------|-----------------|--------|--------|--------|--------|--------|--------|--------|
| Surface m <sup>2</sup>                                                | 300    | 300    | 300    | 300    | 300    | 300    | 300    | 300             | 300    | 300    | 300    | 300    | 300    | 300    | 300    |
| Atitude in m                                                          | 629    | 601    | 547    | 596    | 593    | 570    | 595    | 536             | 619    | 585    | 662    | 587    | 562    | 594    | 582    |
| Orientation                                                           | N      | N      | NE     | SE     | NE     | NE     | N      | E               | NO     | E      | N      | N      | E      | N      | NE     |
| Slope in decimal degrees                                              | 22.14  | 19.32  | 10.8   | 13.36  | 10.44  | 24.86  | 29.53  | 11.24           | 5.07   | 16.69  | 24.94  | 17.33  | 11.36  | 5.9    | 5.95   |
| Cover rate %                                                          | 90     | 80     | 90     | 90     | 80     | 80     | 90     | 90              | 70     | 90     | 90     | 60     | 80     | 60     | 80     |
| Ic                                                                    | 17.77  | 17.8   | 17.92  | 17.8   | 17.8   | 17.86  | 17.79  | 18.04           | 17.89  | 17.83  | 17.72  | 17.81  | 17.87  | 17.98  | 17.85  |
| Io                                                                    | 1.97   | 2.5    | 1.96   | 1.99   | 2      | 1.99   | 2.03   | 2               | 2.41   | 1.95   | 2      | 2.02   | 2      | 2.07   | 1.94   |
| Itc                                                                   | 269.7  | 269.98 | 272.45 | 270.93 | 270.98 | 271.47 | 270.46 | 269.02          | 261.71 | 271.93 | 268.24 | 270.66 | 271.64 | 265.48 | 272.15 |
| N <sup>a</sup> inventory                                              | EnPh24 | EnPh25 | EnPh26 | EnPh27 | EnPh28 | EnPh29 | EnPh30 | EnPh32Ty<br>pus | EnPh33 | EnPh35 | EnPh36 | EnPh37 | EnPh38 | EnPh39 | EnPh40 |
| N° Orden                                                              | 1      | 2      | 3      | 4      | 5      | 6      | 7      | 8               | 9      | 10     | 11     | 12     | 13     | 14     | 15     |
| Characteristic species                                                |        |        |        |        |        |        |        |                 |        |        |        |        |        |        |        |
| <i>Pinus halepensis</i> Mill.                                         | 5      | 4      | 5      | 5      | 4      | 4      | 5      | 5               | 3      | 5      | 5      | 3      | 4      | 3      | 4      |
| <i>Quercus coccifera</i> L. subsp. <i>coccifera</i>                   | 2      | 4      | 4      | 2      | 4      | 4      | 3      | 2               | 3      | +      | 2      | +      | 2      |        | +      |
| <i>Juniperus oxycedrus</i> L. subsp. <i>oxycedrus</i>                 |        | 1      | +      | 1      | +      | 1      | +      | 3               | +      | +      | +      | +      | +      |        | +      |
| <i>Juniperus phoenicea</i> L. subsp. <i>phoenicea</i>                 | 2      | 2      | 1      | +      | 1      | +      | +      | +               |        | +      | +      | +      |        |        |        |
| <i>Bupleurum rigidum</i> L.                                           |        | 1      | 1      |        | +      | 2      |        |                 | 3      |        |        | 1      | 3      | 2      | +      |
| <i>Rubia peregrina</i> L. subsp. <i>peregrina</i>                     | +      |        | 2      | +      | 1      | 2      | 2      |                 |        | +      | +      | 2      | +      |        |        |
| <i>Ephedra nebrodensis</i> Guss.                                      | +      |        | +      | +      | +      | +      | +      | 1               | +      | 1      |        |        | 1      | +      | +      |
| <i>Rhamnus lycioides</i> L. subsp. <i>lycioides</i>                   |        |        | +      |        | +      |        | +      | +               | 3      |        | +      |        |        |        |        |
| <i>Pistacia lentiscus</i> L.                                          |        |        | +      | +      | +      |        |        |                 |        |        |        |        |        |        |        |
| <i>Carex halleriana</i> Asso.                                         | +      |        |        |        |        |        |        |                 | +      |        |        |        |        |        |        |
| <i>Asparagus acutifolius</i> L.                                       |        |        |        | +      |        |        |        |                 |        | +      |        |        |        |        |        |
| <i>Quercus rotundifolia</i> Lam.                                      |        | 2      |        |        |        |        |        |                 |        |        |        |        |        |        |        |
| <i>Rhamnus alaternus</i> L. subsp. <i>alaternus</i>                   |        | +      |        |        |        |        |        |                 |        |        |        |        |        |        |        |
| <i>Arctostaphylos uva-ursi</i> (L.) Spreng.                           |        | +      |        |        |        |        |        |                 |        |        |        |        |        |        |        |
| Companion species                                                     |        |        |        |        |        |        |        |                 |        |        |        |        |        |        |        |
| <i>Carex humilis</i> Leyss.                                           | +      | 1      | 1      | 1      | 1      | 1      | +      | 2               | 2      | 1      | 1      | 1      | 2      | 2      | 2      |
| <i>Brachypodium retusum</i> (Pers.) P. Beauv.                         |        | +      | 3      | 2      | 2      | 3      | 2      | 3               | 1      | 2      | 5      | 2      | +      | 3      |        |
| <i>Stipa orientalis</i> Trin.                                         | +      | +      |        |        | +      | +      | 3      | +               | 1      | 1      | 2      | +      | +      | 1      | 3      |
| <i>Rosmarinus officinalis</i> L.                                      | 2      | +      | +      | +      | +      | +      | 2      | +               |        | +      | +      |        | 2      |        | 1      |
| <i>Centaurea linifolia</i> L.                                         |        | 1      |        | +      | 1      | +      | +      | +               | +      |        |        | +      | +      |        | +      |
| <i>Linum suffruticosum</i> L.                                         |        | +      |        | +      |        | +      | +      | +               |        | +      | +      | +      |        | 1      | +      |
| <i>Coronilla minima</i> L. subsp. <i>lotoides</i> (W.D.J. Koch) Nyman | 3      | +      | +      | +      | +      |        | +      | +               | +      |        |        |        | +      |        | +      |
| <i>Echinops ritro</i> L.                                              | +      |        |        | +      |        | +      | 3      | +               | +      | +      |        | +      |        | +      | +      |

|                                                                                          |   |   |   |   |   |   |   |   |   |   |   |   |   |   |
|------------------------------------------------------------------------------------------|---|---|---|---|---|---|---|---|---|---|---|---|---|---|
| <i>Avenula bromoides</i> (Gouan) H. Scholz                                               |   |   |   |   | + | + |   | + | + | + | + | + | 1 | + |
| <i>Bupleurum frutescens</i> Loefl. ex L.                                                 |   |   | + |   | + |   | + | + | + | + | + |   | + |   |
| <i>Euphorbia minuta</i> Loscos & J. Pardo                                                |   |   |   | + |   | + | + | + |   | + |   | 3 | 1 | + |
| <i>Polygala rupestris</i> Pourr.                                                         |   | + |   |   | + |   | + |   |   | + | 3 | + | + | 3 |
| <i>Pleurochaete squarrosa</i> Linderg                                                    | 1 | 2 | 1 | + | + | + | 3 |   |   |   |   |   |   |   |
| <i>Salvia officinalis</i> L.                                                             |   |   | + |   |   |   | + |   | + |   | + | + | + | 3 |
| <i>Helianthemum myrtifolium</i> (Lam.) Samp.                                             |   |   | + | + |   |   | + |   |   |   | 1 | + | + | + |
| <i>Teucrium chamaedrys</i> L. subsp. <i>pinnatifidum</i><br>(Sennen) Rech. fil.          | + |   | + |   |   |   | 3 | + |   |   | 1 | 1 | + |   |
| <i>Rhaponticum coniferum</i> (L.) Greuter                                                |   |   | + |   |   |   | + | + |   |   | + | + | + |   |
| <i>Aristolochia pistolochia</i> L.                                                       |   |   | 1 | + | + |   | + |   |   |   |   | + | 3 |   |
| <i>Genista scorpius</i> (L.) DC. in Lam. & DC.                                           | + | + |   | + |   |   | + | 1 | + |   |   |   |   |   |
| <i>Aphyllanthes monspeliensis</i> L.                                                     |   |   |   |   |   | + | 3 | + |   |   |   | 3 |   | 2 |
| <i>Fumana ericoides</i> (Cav.) Gand. in Magnier                                          | 3 |   |   |   |   |   |   |   | + |   |   | + | + | + |
| <i>Lavandula latifolia</i> Medik.                                                        |   |   |   |   |   |   |   | + | + | + | + |   |   | + |
| <i>Thymus vulgaris</i> subsp. <i>vulgaris</i> L.                                         |   | + |   |   |   |   |   | + | 1 |   |   | + | + |   |
| <i>Viola rupestris</i> F.W. Schmidt                                                      | + | + | + |   |   |   | + |   |   |   |   |   | + |   |
| <i>Cistus albidus</i> L.                                                                 | + | + |   |   |   |   |   |   |   | + | + |   |   |   |
| <i>Cistus clusii</i> subsp. <i>clusii</i> Dunal                                          |   |   |   |   |   |   | 3 |   | 1 |   |   | + |   | + |
| <i>Cistus libanotis</i> L.                                                               |   |   |   |   |   |   | 3 |   | 1 |   |   | + |   | + |
| <i>Inula montana</i> L.                                                                  |   |   |   |   |   |   |   |   |   | + |   |   | + | + |
| <i>Koeleria vallesiana</i> subsp. <i>vallesiana</i> (Honck.)<br>Gaudin                   |   |   |   |   |   |   |   | + | + |   |   |   | 1 |   |
| <i>Lithodora fruticosa</i> (L.) Griseb.                                                  |   |   |   |   |   |   | + | + |   |   |   |   | + |   |
| <i>Orobanche latisquama</i> (F.W. Schultz) Batt. in<br>Batt. & Trab.                     |   |   |   |   |   |   |   |   | + |   |   | 3 | + |   |
| <i>Stereodon cupressiforme</i> (Hedw.) Brid. ex Mitt.                                    |   | 2 | 2 |   |   |   | + |   |   |   |   |   |   |   |
| <i>Dorycnium pentaphyllum</i> Scop.                                                      |   |   | + |   |   |   | + |   |   |   |   | + |   |   |
| <i>Euphorbia verrucosa</i> Lam. subsp. <i>mariolensis</i><br>(Rouy) Vives                |   |   | + |   |   | + |   |   |   |   |   | + |   |   |
| <i>Anacamptis pyramidalis</i> (L.) Rich.                                                 |   |   |   |   |   |   |   | 3 |   |   |   |   | 3 |   |
| <i>Globularia vulgaris</i> L.                                                            |   | + |   |   |   |   |   |   | + |   |   |   |   |   |
| <i>Hedysarum boveanum</i> Bunge ex Basiner subsp.<br><i>europaeum</i> Guitt. & Kerguelen |   |   |   |   |   |   |   |   | + |   |   |   | + |   |
| <i>Helianthemum syriacum</i> (Jacq.) Dum. Cours.                                         |   |   |   |   |   |   |   |   |   |   |   | + | + |   |
| <i>Ononis fruticosa</i> L.                                                               |   | + |   |   |   |   |   |   | 1 |   |   |   |   |   |
| <i>Staehelina dubia</i> L.                                                               |   |   |   |   |   |   | + |   |   |   |   | + |   |   |

*Teucrium polium* L. subsp. *aragonense* (Loscos & J.Pardo) Nyman

+

+

*Centaureum quadrifolium* (L.) G. López & Jarvis  
subsp. *barrelieri* (L.M. Dufour) G. López

+

+

**Table S2.** *Bupleuro rigidi-Pinetum halepensis*.

| Surface m <sup>2</sup>                        | 300    | 300    | 300    | 300    | 300             | 300    | 300    | 300    | 300    | 300    | 300    | 300    | 300    | 300    | 300    |
|-----------------------------------------------|--------|--------|--------|--------|-----------------|--------|--------|--------|--------|--------|--------|--------|--------|--------|--------|
| Atitude in m                                  | 619    | 532    | 669    | 652    | 700             | 700    | 675    | 671    | 686    | 600    | 570    | 622    | 265    | 327    | 149    |
| Orientation                                   | NE     | S      | N      | N      | N               | N      | O      | N      | E      | N      | E      | NE     | NO     | N      | E      |
| Slope in decimal degrees                      | 11.1   | 6.3    | 19.15  | 4.4    | 17.78           | 20.85  | 15.68  | 22.72  | 20.21  | 22.91  | 21.64  | 16.26  | 16.01  | 24.17  | 23.67  |
| Cover rate %                                  | 85     | 85     | 90     | 90     | 90              | 90     | 90     | 90     | 80     | 65     | 80     | 90     | 80     | 80     | 85     |
| Ic                                            | 17.6   | 18     | 16.97  | 18.88  | 18.73           | 18.73  | 18.82  | 18.83  | 18.87  | 17.77  | 18.79  | 17.58  | 19.38  | 18.76  | 19.37  |
| Io                                            | 2.77   | 2.55   | 2.8    | 2.06   | 2.11            | 2.11   | 2.09   | 2.09   | 2.22   | 2.73   | 1.92   | 2.78   | 1.73   | 1.73   | 1.71   |
| Itc                                           | 237.72 | 249.11 | 230.97 | 258.34 | 255.4           | 255.42 | 256.52 | 256.7  | 249.56 | 241.03 | 268.36 | 237.14 | 283.24 | 284.66 | 291.59 |
| N <sup>a</sup> inventory                      | BrPh10 | BrPh11 | BrPh12 | BrPh14 | BrPh15Typ<br>us | BrPh16 | BrPh17 | BrPh18 | BrPh20 | BrPh21 | BrPh22 | BrPh23 | BrPh45 | BrPh46 | BrPh52 |
| N <sup>o</sup> Orden                          | 1      | 2      | 3      | 4      | 5               | 6      | 7      | 8      | 9      | 10     | 11     | 12     | 13     | 14     | 15     |
| Characteristic species                        |        |        |        |        |                 |        |        |        |        |        |        |        |        |        |        |
| <i>Pinus halepensis</i> Mill.                 | 4      | 4      | 5      | 5      | 5               | 5      | 5      | 5      | 4      | 3      | 4      | 5      | 4      | 4      | 4      |
| <i>Quercus coccifera</i> L.                   | 2      | 3      | 4      | 3      | 3               | 3      | 4      | 3      | 3      | 4      | 2      | 3      | 4      | 3      | 1      |
| <i>Juniperus oxycedrus</i> L.                 | 2      | +      | +      | +      | 2               | 1      | +      | 3      |        | 2      |        | 2      | +      | +      | +      |
| <i>Juniperus phoenicea</i> L.                 | +      | 3      | 1      | +      | +               |        |        | 1      |        | +      |        | +      | 2      | 3      | 2      |
| <i>Carex halleriana</i> Asso.                 | 3      | 1      |        | +      | +               | +      | 2      | +      | 1      | 1      | 1      | +      | +      | 1      | +      |
| <i>Rubia peregrina</i> L.                     | +      | +      | +      | 1      | +               | +      | 2      | 1      | +      | 1      | +      | 1      |        | +      |        |
| <i>Rhamnus lycioides</i> L.                   | +      |        |        |        |                 |        |        |        | +      |        | 3      |        | 1      | +      | 2      |
| <i>Arctostaphylos uva-ursi</i> (L.) Spreng.   |        |        |        | +      | 1               | +      | +      | +      | 4      | 2      | 4      | 3      |        |        |        |
| <i>Pistacia lentiscus</i> L.                  |        |        |        |        |                 |        |        |        |        |        |        |        | 1      | 2      | +      |
| <i>Quercus rotundifolia</i> Lam.              | 3      |        | +      |        | +               | 2      |        |        |        | +      |        | +      |        |        |        |
| <i>Ephedra nebrodensis</i> Guss.              |        |        |        |        |                 |        |        |        | +      |        | 1      |        | +      |        |        |
| <i>Rhamnus alaternus</i> L.                   |        | +      |        |        |                 |        |        |        | +      |        |        |        | +      |        |        |
| <i>Bupleurum rigidum</i> L.                   | +      |        | 1      | 1      | 1               |        | 3      | +      | +      |        |        |        |        |        |        |
| <i>Juniperus thurifera</i> L.                 |        |        |        |        | +               | +      |        | +      | +      |        | 1      |        |        |        |        |
| <i>Phillyrea angustifolia</i> L.              |        |        |        |        |                 |        |        |        |        |        |        |        | +      |        |        |
| <i>Quercus faginea</i> Lam.                   |        |        |        |        |                 |        |        |        | +      |        |        |        |        |        |        |
| Companion species                             |        |        |        |        |                 |        |        |        |        |        |        |        |        |        |        |
| <i>Brachypodium retusum</i> (Pers.) P. Beauv. | +      | 2      | 1      | +      | 1               | +      | 1      | 1      | 2      | 1      | +      | 1      | 1      | 1      | +      |

|                                                                                 |   |   |   |   |   |   |   |   |   |   |   |   |   |   |
|---------------------------------------------------------------------------------|---|---|---|---|---|---|---|---|---|---|---|---|---|---|
| <i>Teucrium chamaedrys</i> L. subsp. <i>pinnatifidum</i><br>(Sennen) Rech. fil. | 1 |   | 1 | 1 | 1 |   | 1 | 3 | + | 2 | 3 |   | + | 1 |
| <i>Thymelaea tinctoria</i> (Pourr.) Endl.                                       | + | + | + | + | + | + | + | + | + |   |   | + | + |   |
| <i>Stereodon cupressiformis</i> (Hedw.) Brid. ex Mitt.                          | 1 | + | 3 | 1 | 1 |   | 2 | 2 | 1 | 2 |   | 2 | 3 |   |
| <i>Helianthemum myrtifolium</i> (Lam.) Samp.                                    | 1 | 2 | + | + |   | + |   | + | + | + |   | + |   |   |
| <i>Rosmarinus officinalis</i> L.                                                | 3 |   |   | + |   |   | + | + |   | + |   | + | 1 | 2 |
| <i>Rhaponticum coniferum</i> (L.) Greuter                                       |   |   | + | + |   | + | + | + |   |   |   |   |   | + |
| <i>Asphodelus cerasiferus</i> J. Gay                                            | 3 |   | + | + | + |   |   |   |   | 3 |   |   |   | + |
| <i>Genista scorpius</i> (L.) DC. in Lam. & DC.                                  | + |   |   |   |   | + |   |   | + |   | + |   |   | + |
| <i>Pleurochaete squarrosa</i> Linderg                                           | + |   |   |   |   |   |   |   | 1 |   |   | + | 1 | + |
| <i>Festuca rubra</i> L.                                                         |   |   |   | 3 | + | + |   | + |   | + |   |   |   |   |
| <i>Viola rupestris</i> F.W. Schmidt                                             |   |   | 1 | 3 | + |   | + | + |   |   |   |   |   |   |
| <i>Dorycnium pentaphyllum</i> Scop.                                             | 1 | 3 |   | + |   |   |   | + |   |   |   | 1 |   |   |
| <i>Helianthemum origanifolium</i> subsp. <i>origanifolium</i><br>(Lam.) Pers.   |   |   |   | + |   |   |   |   |   |   | + |   | + | 1 |
| <i>Salvia officinalis</i> L.                                                    |   | + | + |   | + |   |   |   | + |   |   |   |   |   |
| <i>Cladonia pyxidata</i> (L.) Hoffm.                                            | 3 | + | + | 3 |   |   |   |   |   |   |   |   |   |   |
| <i>Thymus vulgaris</i> L.                                                       |   | 3 |   |   |   |   |   |   | + |   |   |   |   | + |
| <i>Viscum album</i> L. subsp. <i>austriacum</i> (Wiesb.) Vollm.                 | + | + |   |   |   |   |   |   |   |   |   | + |   |   |
| <i>Staehelina dubia</i> L.                                                      |   | + | 3 | 3 |   |   |   |   |   |   |   |   |   |   |
| <i>Bupleurum fruticosum</i> Loebl. ex L.                                        |   | + |   | 3 |   |   |   |   | + |   |   |   |   |   |
| <i>Aristolochia pistolochia</i> L.                                              |   | + |   |   |   |   |   |   |   |   |   |   | + |   |
| <i>Epipactis microphylla</i> (Ehrh.) Sw.                                        |   |   |   |   |   |   | + | + |   |   |   |   |   |   |
| <i>Galium pumilum</i> Murray                                                    | + |   | + |   |   |   |   |   |   |   |   |   |   |   |
| <i>Helianthemum violaceum</i> (Cav.) Pers.                                      |   | + |   |   |   |   |   |   |   |   | + |   |   |   |
| <i>Homalothecium sericeum</i> W. P. Schimper                                    | + |   | 3 |   |   |   |   |   |   |   |   |   |   |   |
| <i>Linum narbonense</i> L.                                                      |   | 3 |   |   |   |   | 3 |   |   |   |   |   |   |   |
| <i>Thalictrum tuberosum</i> L.                                                  |   |   | + |   |   |   |   |   |   | + |   |   |   |   |
| <i>Thesium humifusum</i> DC. in Lam. & DC.                                      |   |   |   |   |   |   |   |   | + |   | + |   |   |   |

**Table S3.** *Rhamno angustifoliae*-*Pinetum halepensis*.

|                      | Surface m²                                                                                     | 300    | 300    | 300    | 300    | 300    | 300    | 300    | 300    | 300    | 300    | 300    | 300    | 300    | 300    | 300    | 300    | 300       | 300   | 300    | 300    |
|----------------------|------------------------------------------------------------------------------------------------|--------|--------|--------|--------|--------|--------|--------|--------|--------|--------|--------|--------|--------|--------|--------|--------|-----------|-------|--------|--------|
|                      | Atitude in m                                                                                   | 1212   | 1233   | 1179   | 1150   | 1326   | 1192   | 1100   | 1209   | 1154   | 1179   | 1179   | 1254   | 1086   | 1160   | 1111   | 1011   | 1100      | 971   | 894    | 1212   |
|                      | Orientation                                                                                    | NE     | NE     | SO     | SE     | NO     | E      | E      | SO     | NE     | N      | E      | E      | NO     | E      | NO     | O      | E         | NO    | SE     | E      |
|                      | Slope in decimal degrees                                                                       | 7.82   | 19.76  | 19.43  | 8.19   | 12.51  | 15.82  | 12.89  | 7.52   | 13.86  | 26.67  | 19.43  | 6.76   | 26.32  | 15.29  | 3.87   | 14.78  | 12.89     | 6.6   | 17.93  | 22.2   |
|                      | Cover rate %                                                                                   | 80     | 80     | 80     | 55     | 95     | 70     | 65     | 55     | 65     | 65     | 40     | 55     | 55     | 55     | 65     | 65     | 65        | 65    | 55     | 55     |
|                      | Ic                                                                                             | 18.02  | 17.85  | 17.87  | 18.62  | 18.34  | 18.57  | 18.07  | 18.58  | 18.08  | 18.59  | 17.87  | 18.54  | 18.51  | 17.78  | 17.85  | 17.7   | 18.07     | 17.6  | 17.45  | 18.52  |
|                      | Io                                                                                             | 2.23   | 2.47   | 2.39   | 2.3    | 2.64   | 2.43   | 2.12   | 2.25   | 2.21   | 2.4    | 2.39   | 2.33   | 1.99   | 2.33   | 2.23   | 2.08   | 2.12      | 2.04  | 2.02   | 2.47   |
|                      | Itc                                                                                            | 230.18 | 228.71 | 233.32 | 245.39 | 230.21 | 232.87 | 247.87 | 233.38 | 238.31 | 234.47 | 233.32 | 229.61 | 260.01 | 238.42 | 248.41 | 270.19 | 247.87    | 275.7 | 282.81 | 231.04 |
|                      | Nº inventory                                                                                   | RanPh  | RanPh030T | RanPh | RanPh  | RanPh  |
|                      | Nº Orden                                                                                       | 063    | 065    | 066    | 010    | 011    | 012    | 030    | 033    | 034    | 049    | 066    | 069    | 071    | 017    | 019    | 024    | ypus      | 038   | 043    | 044    |
|                      |                                                                                                | 1      | 2      | 3      | 4      | 5      | 6      | 7      | 8      | 9      | 10     | 11     | 12     | 13     | 14     | 15     | 16     | 17        | 18    | 19     | 20     |
| Rhamnus oleoides     | Characteristic species                                                                         |        |        |        |        |        |        |        |        |        |        |        |        |        |        |        |        |           |       |        |        |
|                      | <i>Pinus halepensis</i> Mill.                                                                  | 4      | 4      | 4      | 3      | 5      | 4      | 3      | 3      | 3      | 3      | 2      | 3      | 3      | 3      | 3      | 3      | 3         | 3     | 3      | 3      |
|                      | <i>Rhamnus oleoides</i> subsp. <i>angustifolia</i> (Lange & Willk.) Rivas Mart. & J.M. Pizarro | 2      | 2      | 2      | 1      | 2      | 1      | 2      | 1      | 2      | 2      | 1      | 1      | 1      | 1      | 2      | 2      | 2         | 2     | 1      | 1      |
|                      | <i>Quercus rotundifolia</i> Lam.                                                               | 2      | 2      | 1      | 1      | +      |        | +      | +      | +      | +      | 1      | 1      | 1      | 1      | 2      | 1      | 1         | 1     | 1      | 1      |
|                      | <i>Juniperus oxycedrus</i> subsp. <i>oxycedrus</i> L.                                          |        |        |        | 1      | 3      | +      | +      | +      | +      | +      |        |        | +      | +      |        |        |           | 2     |        | 2      |
|                      | <i>Juniperus phoenicea</i> subsp. <i>phoenicea</i> L.                                          |        |        |        |        |        | +      |        |        |        |        |        |        | +      | +      | 1      | 1      |           |       |        |        |
|                      | <i>Carex halleriana</i> Asso.                                                                  | 1      | 1      |        |        |        |        |        |        |        |        | 2      |        |        |        |        |        |           | 1     |        |        |
|                      | <i>Rhamnus lycioides</i> subsp. <i>lycioides</i> L.                                            |        |        | 1      |        |        |        |        |        |        |        |        |        |        |        |        |        |           |       |        |        |
|                      | <i>Asparagus acutifolius</i> L.                                                                |        |        |        | +      |        |        |        |        |        |        |        |        |        |        |        |        |           |       |        |        |
|                      | <i>Daphne gnidium</i> L.                                                                       |        |        |        | +      |        | +      |        |        |        |        |        |        |        |        | 1      | 2      |           |       | 1      |        |
|                      | <i>Quercus coccifera</i> subsp. <i>coccifera</i> L.                                            |        |        |        |        |        |        |        |        | 2      |        |        |        |        |        |        |        |           | 1     |        | 2      |
| Crataegus monogyna   | <i>Crataegus monogyna</i> subsp. <i>brevispina</i> (Kunze) Franco                              |        |        |        |        | 1      | +      |        |        |        |        |        |        |        |        |        |        |           |       |        |        |
|                      | <i>Pistacia lentiscus</i> L.                                                                   |        |        |        |        |        |        |        |        |        |        |        |        |        |        |        |        |           |       |        |        |
|                      | <i>Pistacia terebinthus</i> L.                                                                 |        |        |        |        | +      | +      |        |        |        |        |        |        |        |        |        |        |           |       |        |        |
|                      | Companion species                                                                              |        |        |        |        |        |        |        |        |        |        |        |        |        |        |        |        |           |       |        |        |
|                      | <i>Rosmarinus officinalis</i> L.                                                               | 2      | 2      | 2      | 2      | 2      | 2      | 2      | 2      | 2      | 2      |        | 2      |        |        |        |        | 2         | 2     |        | 2      |
|                      | <i>Macrochloa tenacissima</i> (L.) Kunth                                                       | 1      | 1      | 1      | 3      | +      | 2      | 2      |        |        |        | 2      |        | 2      | 1      |        |        |           | 2     | 2      |        |
| Brachypodium retusum | <i>Brachypodium retusum</i> subsp. <i>retusum</i> (Pers.) P. Beauv.                            | 2      |        | 1      |        | 2      | 1      | 2      |        |        |        | 2      |        |        | 2      | 2      | 2      | 2         |       | 2      |        |
|                      | <i>Thymus zygis</i> subsp. <i>gracilis</i> (Boiss.) R. Morales                                 | 1      | 1      |        | 3      | 1      |        | 2      |        | 2      | 2      |        |        | 2      | 1      | 1      |        |           |       |        |        |
| Genista scorpius     | <i>Genista scorpius</i> (L.) DC. in Lam. & DC.                                                 | 1      | 1      |        |        |        | 1      |        | 2      |        | 2      |        | 2      |        |        |        | 2      | 2         |       | 2      |        |
|                      | <i>Thymus membranaceus</i> subsp. <i>membranaceus</i> Boiss.                                   |        |        |        |        |        |        |        |        |        |        | 2      |        |        | 1      | 2      | 2      | 2         | 1     | 2      | 2      |
| Erinacea anthyllis   | <i>Erinacea anthyllis</i> Link                                                                 |        |        | 2      |        | +      |        |        |        |        |        | 2      |        | 2      | 2      | 2      |        |           |       |        |        |
|                      | <i>Festuca scariosa</i> (Lag.) Asch. & Graebn.                                                 |        |        |        |        | +      |        |        |        |        |        | 2      | 2      | 2      |        |        |        |           |       |        |        |
| Cistus clusii        | <i>Cistus clusii</i> subsp. <i>clusii</i> Dunal                                                |        | 1      |        | 1      |        |        |        | 1      | 2      |        |        |        |        |        |        |        |           |       |        |        |
|                      | <i>Lavandula stoechas</i> L.                                                                   | 3      | 3      | 3      |        |        |        |        |        |        |        |        |        |        |        |        |        |           |       |        |        |
| Helichrysum stoechas | <i>Helichrysum stoechas</i> (L.) Moench                                                        | 1      | 1      | 1      |        |        |        |        |        |        |        |        |        |        |        |        |        |           |       |        |        |
|                      | <i>Helianthemum almeriense</i> Pau                                                             |        |        |        |        |        |        |        |        |        |        |        |        |        |        |        |        |           | 1     | 1      | 1      |
| Bupleurum frutescens | <i>Bupleurum frutescens</i> subsp. <i>spinosum</i> (Gouan) O. Bolòs & Vigo                     |        |        |        |        |        |        |        |        |        |        | 2      |        |        |        |        |        |           | 1     |        | 2      |

|                                                                          |   |  |   |   |   |  |  |   |  |  |  |  |   |   |  |   |
|--------------------------------------------------------------------------|---|--|---|---|---|--|--|---|--|--|--|--|---|---|--|---|
| <i>Fumana thymifolia</i> (L.) Spach ex Webb                              |   |  |   |   |   |  |  | 2 |  |  |  |  |   | 1 |  | 1 |
| <i>Genista cinerea</i> subsp. <i>speciosa</i> Losa & Rivas Goday (Vill.) |   |  |   |   |   |  |  |   |  |  |  |  |   |   |  |   |
| DC.                                                                      |   |  |   |   |   |  |  |   |  |  |  |  |   |   |  |   |
| <i>Phlomis lychnitis</i> L.                                              |   |  | 3 | 2 | + |  |  |   |  |  |  |  |   |   |  |   |
| <i>Dorycnium pentaphyllum</i> Scop.                                      | 1 |  |   |   |   |  |  |   |  |  |  |  |   |   |  |   |
| <i>Euphorbia nicaeensis</i> All.                                         |   |  | 3 |   | + |  |  |   |  |  |  |  |   |   |  |   |
| <i>Sideritis incana</i> L.                                               |   |  |   |   |   |  |  |   |  |  |  |  |   | 1 |  | 1 |
| <i>Stipa lagascae</i> Roem. & Schult.                                    |   |  |   |   |   |  |  |   |  |  |  |  |   | 1 |  | 1 |
| <i>Thymus mastichina</i> subsp. <i>mastichina</i> (L.) L.                |   |  |   | 1 | + |  |  |   |  |  |  |  |   |   |  |   |
| <i>Trifolium spumosum</i> L.                                             |   |  |   |   |   |  |  |   |  |  |  |  | 2 |   |  | 1 |
| <i>Ulex parviflorus</i> subsp. <i>parviflorus</i> Pourr.                 |   |  | + | 1 |   |  |  |   |  |  |  |  |   |   |  |   |

**Table S4.** *Rhamno laderoi*-*Pinetum halepensis*.

| Surface m²                                                | 300      | 300      | 300      | 300      | 300      | 300      | 300      | 300      | 300      | 300      | 300      | 300      | 300      | 300      | 300 | 300      |
|-----------------------------------------------------------|----------|----------|----------|----------|----------|----------|----------|----------|----------|----------|----------|----------|----------|----------|-----|----------|
| Atitude in m                                              | 1270     | 1076     | 1034     | 1102     | 1040     | 1223     | 1071     | 226      | 422      | 552      | 144      | 560      | 1012     | 894      |     | 226      |
| Orientation                                               | O        | S        | S        | O        | SO       | NE       | NE       | NO       | S        | NE       | S        | S        | O        | SE       |     | NO       |
| Slope in decimal degrees                                  | 22.39    | 10.1     | 28.19    | 13.39    | 35.8     | 14.09    | 11.58    | 25.48    | 12.33    | 27.98    | 28.51    | 31.64    | 40.25    | 33.22    |     | 25.48    |
| Cover rate %                                              | 60       | 60       | 80       | 65       | 80       | 65       | 65       | 60       | 60       | 65       | 90       | 60       | 60       | 65       |     | 50       |
| Ic                                                        | 18.44    | 18.24    | 18.37    | 18.38    | 16.97    | 18.66    | 17.5     | 13.33    | 13.55    | 15.52    | 14.05    | 14.87    | 18.74    | 16.05    |     | 13.33    |
| Io                                                        | 3.75     | 3.21     | 3.11     | 3.23     | 3.37     | 3.69     | 3.44     | 2.36     | 2.59     | 2.78     | 1.94     | 2.88     | 2.54     | 3.12     |     | 2.36     |
| Itc                                                       | 244.61   | 282.46   | 284.49   | 272.54   | 296.91   | 238.15   | 272.02   | 434.04   | 423.51   | 371.18   | 424.74   | 379.4    | 277.37   | 329.67   |     | 434.04   |
| Nª inventory                                              | RlaPh029 | RlaPh034 | RlaPh035 | RlaPh036 | RlaPh050 | RlaPh032 | RlaPh041 | RlaPh011 | RlaPh014 | RlaPh016 | RlaPh024 | RlaPh025 | RlaPh060 | RlaPh018 |     | RlaPh011 |
| Nº Orden                                                  | 1        | 2        | 3        | 4        | 6        | 8        | 9        | 10       | 11       | 12       | 13       | 14       | 16       | 17       |     | 18       |
| Characteristic species                                    |          |          |          |          |          |          |          |          |          |          |          |          |          |          |     |          |
| <i>Pinus halepensis</i> Mill.                             | 3        | 3        | 4        | 3        | 4        | 3        | 3        | 3        | 3        | 3        | 5        | 3        | 3        | 3        |     | 2        |
| <i>Rhamnus ladedroi</i> Rivas-Mart. & J.M. Pizarro        | 1        | 2        | 1        | 1        | 1        |          | +        | 1        | +        | 1        | +        | +        | +        | 1        |     | +        |
| <i>Juniperus oxycedrus</i> subsp. <i>oxycedrus</i> L.     | 2        | 2        | 1        | 2        |          |          |          |          | 2        | 2        |          | 2        |          |          |     |          |
| <i>Daphne gnidium</i> L.                                  | 1        | 1        | 1        | 2        | 1        |          |          |          |          |          |          |          |          | 2        |     |          |
| <i>Quercus coccifera</i> L. subsp. <i>coccifera</i>       |          | 2        |          |          | 2        |          | 2        |          |          | 2        |          |          |          |          |     |          |
| <i>Olea europaea</i> var. <i>sylvestris</i> (Mill.) Lehr  |          |          |          |          |          |          |          | 2        | 2        | 2        |          |          |          | 2        |     |          |
| <i>Rhamnus myrtifolia</i> Willk.                          | 1        | 1        | 1        | 1        |          |          |          |          |          | 1        |          |          |          |          |     |          |
| <i>Quercus rotundifolia</i> Lam.                          | 1        | 2        |          |          | 1        | 1        |          |          |          |          |          |          |          |          |     |          |
| <i>Chamaerops humilis</i> L.                              |          |          |          |          |          |          |          |          |          | 2        | 2        | 3        |          |          |     |          |
| <i>Asparagus acutifolius</i> L.                           |          |          |          |          |          |          | 2        | 2        |          |          |          |          |          |          |     |          |
| <i>Rhamnus alaternus</i> L. subsp. <i>alaternus</i>       |          |          |          |          |          |          |          |          | 2        |          |          |          |          |          |     |          |
| <i>Rhamnus alaternus</i> subsp. <i>parvifolia</i> Arcang. |          |          |          |          |          |          |          |          |          |          |          |          |          |          |     | +        |
| <i>Rhamnus velutina</i> Boiss. subsp. <i>velutina</i>     |          |          |          |          |          |          |          |          | 2        |          |          |          |          |          |     |          |
| <i>Juniperus phoenicea</i> L. subsp. <i>phoenicea</i>     |          |          |          |          |          |          |          |          |          |          |          |          | 1        |          |     |          |
| <i>Pinus pinaster</i> Aiton                               |          |          |          |          | 1        |          |          |          |          |          |          |          |          |          |     |          |
| <i>Aristolochia baetica</i> L.                            |          |          |          |          |          |          |          | 2        |          |          |          |          |          |          |     |          |
| <i>Buxus balearica</i> Lam.                               |          |          |          |          |          |          |          |          |          | 2        |          |          |          |          |     |          |

[illegible]
